# Supplementary material
Source: MDPI journal article supplement (https://www.mdpi.com/2674-0516/3/1/1)
Supplement: s1 [file s1]

Archive with 1 entries (1 files):
- powders-2596194-supplementary.pdf
